# Supplementary material for: Demographics, Epidemiology, Mortality, and Difficult-To-Treat Resistance Patterns of Bacterial Bloodstream Infections in the Global United States Military Health System from 2010–2019: A Retrospective Cohort Study
Source: PubMed Central journal article supplement — medRxiv. 2024 Oct 3:2024.10.02.24314780. Preprint. [Version 1] doi: 10.1101/2024.10.02.24314780 (PMC11722484; doi:10.1101/2024.10.02.24314780), 2024-10-03
Supplement: media-2.pdf [file media-2.pdf]

**Manuscript Title:** Demographics, Epidemiology, Mortality, and Difficult-To-Treat Resistance Patterns of Bacterial Bloodstream Infections in the Global United States Military Health System from 2010-2019: A Retrospective Cohort Study

**Authors:** Alexander C Vostal, Melissa Grance, John H Powers, III, Sameer S Kadri, Sarah Warner, Uzo Chukwuma, Carlos Morales, Charlotte Lanteri, M Leigh Carson, Beth Poitras, Nicholas Seliga, Dean Follmann, Jing Wang, Edward Parmelee, Katrin Mende

**Supplemental Table 1.** Categorization of Bacterial Subspecies that are associated with Bloodstream Infection

| Lactose-Fermenting Gram-negative Bacilli | <i>Streptococcus</i> and <i>Enterococcus</i> species           | <i>Staphylococcus aureus</i> | Non-Lactose-Fermenting Gram-negative Bacilli         |
|------------------------------------------|----------------------------------------------------------------|------------------------------|------------------------------------------------------|
| <i>Escherichia coli</i>                  | <b><i>Streptococcus</i> <math>\beta</math>-Hemolytic group</b> | <i>Staphylococcus aureus</i> | <i>Pseudomonas aeruginosa</i>                        |
| <i>Klebsiella pneumoniae</i>             | $\beta$ -hemolytic <i>Streptococcus</i> spp.                   |                              | <b><i>Acinetobacter</i> spp.</b>                     |
| <b><i>Serratia</i> spp.</b>              | $\beta$ -hemolytic <i>Streptococcus</i> spp, Group A           |                              | <i>Acinetobacter baumannii</i>                       |
| <i>Serratia ficaria</i>                  | $\beta$ -hemolytic <i>Streptococcus</i> spp, Group B           |                              | <i>Acinetobacter baumannii calcoaceticus</i> complex |
| <i>Serratia liquefaciens</i>             | $\beta$ -hemolytic <i>Streptococcus</i> spp, Group C           |                              | <i>Acinetobacter haemolyticus</i>                    |
| <i>Serratia marcescens</i>               | $\beta$ -hemolytic <i>Streptococcus</i> spp, Group D           |                              | <i>Acinetobacter lwoffii</i>                         |
| <i>Serratia odorifera 1</i>              | $\beta$ -hemolytic <i>Streptococcus</i> spp, Group F           |                              | <i>Acinetobacter radioresistens</i>                  |
| <i>Serratia plymuthica</i>               | $\beta$ -hemolytic <i>Streptococcus</i> spp, Group G           |                              | <i>Acinetobacter</i> spp.                            |
| <i>Serratia rubidaea</i>                 | <i>Streptococcus agalactiae</i>                                |                              | <i>Acinetobacter ursingii</i>                        |
| <i>Serratia</i> spp.                     | <i>Streptococcus canis</i>                                     |                              | <b><i>Stenotrophomonas</i> spp.</b>                  |
| <b><i>Citrobacter</i> spp.</b>           | <i>Streptococcus dysgalactiae</i>                              |                              | <i>Stenotrophomonas maltophilia</i>                  |
| <i>Citrobacter amalonaticus</i>          | <i>Streptococcus dysgalactiae</i> SS. <i>dysgalactiae</i>      |                              |                                                      |
| <i>Citrobacter braakii</i>               | <i>Streptococcus dysgalactiae</i> SS. <i>equisimilis</i>       |                              |                                                      |
| <i>Citrobacter farmeri</i>               | <i>Streptococcus equi</i>                                      |                              |                                                      |

| <b>Lactose-Fermenting Gram-negative Bacilli</b> | <b><i>Streptococcus</i> and <i>Enterococcus</i> species</b>     | <b><i>Staphylococcus aureus</i></b> | <b>Non-Lactose-Fermenting Gram-negative Bacilli</b> |
|-------------------------------------------------|-----------------------------------------------------------------|-------------------------------------|-----------------------------------------------------|
| <i>Citrobacter freundii</i>                     | <i>Streptococcus equisimilis</i>                                |                                     |                                                     |
| <i>Citrobacter koseri (diversus)</i>            | <i>Streptococcus porcinus</i>                                   |                                     |                                                     |
| <i>Citrobacter</i> spp.                         | <i>Streptococcus pyogenes</i>                                   |                                     |                                                     |
| <i>Citrobacter youngae</i>                      | <b><i>Streptococcus</i> spp.</b>                                |                                     |                                                     |
| <b><i>Enterobacter</i> spp.</b>                 | <i>Streptococcus</i> spp.                                       |                                     |                                                     |
| <i>Enterobacter agglomerans</i>                 | <i>Streptococcus</i> nutritionally variant                      |                                     |                                                     |
| <i>Enterobacter amnigenus</i> 1                 | <b><i>Streptococcus viridans</i> group</b>                      |                                     |                                                     |
| <i>Enterobacter amnigenus</i> 2                 | $\alpha$ hemolytic <i>Streptococcus</i> spp.,<br>viridans group |                                     |                                                     |
| <i>Enterobacter asburiae</i>                    | <i>Streptococcus acidominimus</i>                               |                                     |                                                     |
| <i>Enterobacter cancerogenus</i>                | <i>Streptococcus alactolyticus</i>                              |                                     |                                                     |
| <i>Enterobacter gergoviae</i>                   | <i>Streptococcus anginosus</i>                                  |                                     |                                                     |
| <i>Enterobacter sakazakii</i>                   | <i>Streptococcus constellatus</i>                               |                                     |                                                     |
| <i>Enterobacter</i> spp.                        | <i>Streptococcus cristatus</i>                                  |                                     |                                                     |
| <i>Enterobacter taylorae</i>                    | <i>Streptococcus gordonii</i>                                   |                                     |                                                     |
| <b><i>Proteus</i> spp.</b>                      | <i>Streptococcus mitis</i>                                      |                                     |                                                     |
| <i>Proteus penneri</i>                          | <i>Streptococcus mutans</i>                                     |                                     |                                                     |
| <i>Proteus</i> spp.                             | <i>Streptococcus parasanguinis</i>                              |                                     |                                                     |
| <i>Proteus vulgaris</i>                         | <i>Streptococcus salivarius</i>                                 |                                     |                                                     |
|                                                 | <i>Streptococcus sanguinis</i>                                  |                                     |                                                     |
|                                                 | <i>Streptococcus sanguis</i>                                    |                                     |                                                     |
|                                                 | <i>Streptococcus sanguis I</i>                                  |                                     |                                                     |
|                                                 | <i>Streptococcus sanguis II</i>                                 |                                     |                                                     |
|                                                 | <i>Streptococcus sobrinus</i>                                   |                                     |                                                     |
|                                                 | <i>Streptococcus thermophilus</i>                               |                                     |                                                     |
|                                                 | <i>Streptococcus thoraltensis</i>                               |                                     |                                                     |

---

| <b>Lactose-Fermenting Gram-negative Bacilli</b> | <b><i>Streptococcus</i> and <i>Enterococcus</i> species</b> | <b><i>Staphylococcus aureus</i></b> | <b>Non-Lactose-Fermenting Gram-negative Bacilli</b> |
|-------------------------------------------------|-------------------------------------------------------------|-------------------------------------|-----------------------------------------------------|
|                                                 | <i>Streptococcus vestibularis</i>                           |                                     |                                                     |
|                                                 | <b><i>Streptococcus pneumoniae</i></b>                      |                                     |                                                     |
|                                                 | <b><i>Enterococcus</i> species</b>                          |                                     |                                                     |
|                                                 | <i>Enterococcus avium</i>                                   |                                     |                                                     |
|                                                 | <i>Enterococcus casseliflavus</i>                           |                                     |                                                     |
|                                                 | <i>Enterococcus durans</i>                                  |                                     |                                                     |
|                                                 | <i>Enterococcus faecalis</i>                                |                                     |                                                     |
|                                                 | <i>Enterococcus faecium</i>                                 |                                     |                                                     |
|                                                 | <i>Enterococcus gallinarum</i>                              |                                     |                                                     |
|                                                 | <i>Enterococcus hirae</i>                                   |                                     |                                                     |
|                                                 | <i>Enterococcus raffinosus</i>                              |                                     |                                                     |
|                                                 | <i>Enterococcus</i> spp.                                    |                                     |                                                     |

---

**Supplemental Table 2.** Geographic Location of Facilities Where Bloodstream Infections (BSI) Were Diagnosed

| Geographic Location                         | BSI Episodes<br>No. (%)<br>(N=15,357) |
|---------------------------------------------|---------------------------------------|
| <b>Continental United States</b>            | 14,653 (95.4)                         |
| Texas                                       | 3128 (20.4)                           |
| California                                  | 2171 (14.1)                           |
| Maryland                                    | 1621 (10.6)                           |
| Virginia                                    | 1272 (8.3)                            |
| Georgia                                     | 971 (6.3)                             |
| North Carolina                              | 840 (5.5)                             |
| Florida                                     | 532 (3.5)                             |
| Nevada                                      | 403 (2.6)                             |
| Ohio                                        | 327 (2.1)                             |
| Mississippi                                 | 274 (1.8)                             |
| Kentucky                                    | 218 (1.4)                             |
| District of Columbia                        | 202 (1.3)                             |
| Missouri                                    | 202 (1.3)                             |
| Colorado                                    | 160 (1.0)                             |
| Illinois                                    | 71 (0.5)                              |
| Oklahoma                                    | 64 (0.4)                              |
| Kansas                                      | 53 (0.4)                              |
| Louisiana                                   | 36 (0.2)                              |
| South Carolina                              | 34 (0.2)                              |
| New York                                    | 12 (0.1)                              |
| Idaho                                       | 7 (0.1)                               |
| Nebraska                                    | 4 (0.03)                              |
| Tennessee                                   | 2 (0.01)                              |
| New Mexico                                  | 1 (0.01)                              |
| South Dakota                                | 1 (0.01)                              |
| <b>Outside of Continental United States</b> |                                       |
| Hawaii                                      | 794 (5.2)                             |
| Alaska                                      | 196 (1.3)                             |
| Guam                                        | 287 (1.9)                             |
| Germany                                     | 194 (1.3)                             |
| Japan                                       | 124 (0.8)                             |
| South Korea                                 | 44 (0.3)                              |
| United Kingdom                              | 24 (0.2)                              |
| Italy                                       | 15 (0.1)                              |
| Spain                                       | 11 (0.1)                              |

|         |          |
|---------|----------|
| Cuba    | 3 (0.02) |
| Bahrain | 1 (0.01) |
| Turkey  | 1 (0.01) |

---

**Supplemental Table 3.** Comorbidities Prior to Development of Bloodstream Infections (BSI)

| Comorbidity                                                     | BSI Episodes<br>No. (%)<br>(N=15,357) |
|-----------------------------------------------------------------|---------------------------------------|
| No comorbidity                                                  | 2,501 (16.3)                          |
| Chronic pulmonary disease                                       | 7,617 (49.6)                          |
| Diabetes without chronic complication                           | 6,939 (45.2)                          |
| Peripheral vascular disease                                     | 5,354 (34.9)                          |
| Renal disease                                                   | 5,260 (34.3)                          |
| Malignancy, including lymphoma and leukemia <sup>a</sup>        | 5,238 (34.1)                          |
| Congestive heart failure                                        | 4,761 (31.0)                          |
| Cerebrovascular disease                                         | 4,531 (29.5)                          |
| Diabetes with chronic complications                             | 4,104 (26.7)                          |
| Mild liver disease                                              | 3,391 (22.1)                          |
| Myocardial infarction                                           | 2,903 (18.9)                          |
| Metastatic solid tumor                                          | 1,765 (11.5)                          |
| Peptic ulcer disease                                            | 1,612 (10.5)                          |
| Rheumatic disease                                               | 1,372 (8.9)                           |
| Dementia                                                        | 1,370 (8.9)                           |
| Hemiplegia or paraplegia                                        | 1,230 (8.0)                           |
| Moderate or severe liver disease                                | 653 (4.3)                             |
| AIDS/HIV                                                        | 89 (0.6)                              |
| Pre-Bloodstream Infection Updated CCI,<br>Median score (+/- SD) | 3.0 (3.37)                            |

CCI – Charlson Comorbidity Index; SD – standard deviation

<sup>a</sup> Excludes non-melanoma malignant neoplasms of the skin

**Supplemental Table 4.** Demographics and Comorbidities Stratified by Bloodstream Infection (BSI) Organisms

| Characteristics                                | Total BSI Episodes,<br>No. (%)<br>(N=15,357) | BSI Episodes, No. (%)                   |                                                                 |                                                     |                                              |
|------------------------------------------------|----------------------------------------------|-----------------------------------------|-----------------------------------------------------------------|-----------------------------------------------------|----------------------------------------------|
|                                                |                                              | Lactose-<br>Fermenting GNB<br>(N=6,401) | <i>Streptococcus</i> /<br><i>Enterococcus</i> spp.<br>(N=5,072) | <i>Staphylococcus</i><br><i>aureus</i><br>(N=3,040) | Non-Lactose-<br>Fermenting<br>GNB<br>(N=844) |
| <i>Age Group, years</i>                        |                                              |                                         |                                                                 |                                                     |                                              |
| 18-25                                          | 1,302 (8.5)                                  | 431 (6.7)                               | 484 (9.5)                                                       | 286 (9.4)                                           | 101 (12.0)                                   |
| 26-35                                          | 1,121 (7.3)                                  | 436 (6.8)                               | 388 (7.7)                                                       | 225 (7.4)                                           | 72 (8.5)                                     |
| 36-45                                          | 951 (6.2)                                    | 391 (6.1)                               | 303 (6.0)                                                       | 211 (6.9)                                           | 46 (5.5)                                     |
| 46-64                                          | 4,288 (27.9)                                 | 1,820 (28.4)                            | 1,381 (27.2)                                                    | 886 (29.1)                                          | 201 (23.8)                                   |
| ≥65                                            | 7,695 (50.1)                                 | 3,323 (51.9)                            | 2,516 (49.6)                                                    | 1,432 (47.1)                                        | 424 (50.2)                                   |
| <i>Sex</i>                                     |                                              |                                         |                                                                 |                                                     |                                              |
| Female                                         | 6,811 (44.4)                                 | 3,408 (53.2)                            | 2,039 (40.2)                                                    | 1,076 (35.4)                                        | 288 (34.1)                                   |
| Male                                           | 8,546 (55.6)                                 | 2,993 (46.8)                            | 3,033 (59.8)                                                    | 1,964 (64.6)                                        | 556 (65.9)                                   |
| <i>Race</i>                                    |                                              |                                         |                                                                 |                                                     |                                              |
| African American                               | 2,524 (16.4)                                 | 1,051 (16.4)                            | 859 (16.9)                                                      | 439 (14.4)                                          | 175 (20.7)                                   |
| Asian or Pacific Islander                      | 1,162 (7.6)                                  | 608 (9.5)                               | 312 (6.2)                                                       | 186 (6.1)                                           | 56 (6.6)                                     |
| Caucasian                                      | 8,798 (57.3)                                 | 3,436 (53.7)                            | 3,022 (59.6)                                                    | 1,884 (62.0)                                        | 456 (54.0)                                   |
| Other                                          | 2,873 (18.7)                                 | 1,306 (20.4)                            | 879 (17.3)                                                      | 531 (17.5)                                          | 157 (18.6)                                   |
| <i>Comorbidities preceding BSI<sup>a</sup></i> |                                              |                                         |                                                                 |                                                     |                                              |
| Chronic pulmonary disease                      | 7,617 (49.6)                                 | 2,960 (46.2)                            | 2,657 (52.4)                                                    | 1,568 (51.6)                                        | 432 (51.2)                                   |
| Diabetes without chronic complication          | 6,939 (45.2)                                 | 2,902 (45.3)                            | 2,222 (43.8)                                                    | 1,464 (48.2)                                        | 351 (41.6)                                   |
| Peripheral vascular disease                    | 5,354 (34.9)                                 | 2,023 (31.6)                            | 1,833 (36.1)                                                    | 1,184 (38.9)                                        | 314 (37.2)                                   |
| Renal disease                                  | 5,260 (34.3)                                 | 2,003 (31.3)                            | 1,762 (34.7)                                                    | 1,169 (38.5)                                        | 326 (38.6)                                   |

|                                                              |              |              |              |              |            |
|--------------------------------------------------------------|--------------|--------------|--------------|--------------|------------|
| Malignancy, including lymphoma and leukemia <sup>b</sup>     | 5,238 (34.1) | 2,152 (33.6) | 1,762 (34.7) | 948 (31.2)   | 376 (44.5) |
| Congestive heart failure                                     | 4,761 (31.0) | 1,659 (25.9) | 1,712 (33.8) | 1,096 (36.1) | 294 (34.8) |
| Pre-Bloodstream Infection Updated CCI, Median score (+/- SD) | 3.0 (3.4)    | 3.0 (3.3)    | 3.0 (3.4)    | 4.0 (3.4)    | 4 (3.6)    |

---

CCI – Charlson Comorbidity Index; GNB – Gram-negative bacilli; SD – standard deviation

<sup>a</sup> Most frequent comorbidities are listed. Categories are not mutually exclusive. These comorbidities are an amalgamation of the Clinical Classification Software diagnosis mapping categories.

<sup>b</sup> Excludes malignant neoplasms of the skin



**Supplemental Table 5.** Rates of *In Vitro* Antimicrobial Resistance of Pathogens associated with BSI Episodes

| Antimicrobial Resistance                                    | BSI episodes with Gram-Negative (GN) Bacteria, No. (%) |                                                       |                                   |                                         |                                             |                                       |
|-------------------------------------------------------------|--------------------------------------------------------|-------------------------------------------------------|-----------------------------------|-----------------------------------------|---------------------------------------------|---------------------------------------|
|                                                             | All GN Bacteria BSI Episodes (N=3,707)                 | <i>Acinetobacter</i> spp. (N=81)                      | <i>Citrobacter</i> spp. (N=71)    | <i>Escherichia coli</i> (N=2,382)       | <i>Klebsiella pneumoniae</i> (N=769)        | <i>Pseudomonas aeruginosa</i> (N=404) |
| Carbapenem-class antibiotic resistance                      | 113 (3.0)                                              | 24 (29.6)                                             | 3 (4.2)                           | 6 (0.3)                                 | 10 (1.3)                                    | 70 (17.3)                             |
| Extended-spectrum Cephalosporin-class antibiotic resistance | 400 (10.8)                                             | 30 (37.0)                                             | 2 (2.8)                           | 266 (11.2)                              | 63 (8.2)                                    | 39 (9.7)                              |
| Fluoroquinolone-class antibiotics resistance                | 865 (23.3)                                             | 27 (33.3)                                             | 5 (7.0)                           | 677 (28.4)                              | 79 (10.3)                                   | 77 (19.1)                             |
| Piperacillin-tazobactam resistance <sup>a</sup>             | 218 (7.9% of 2,758)                                    | 15 (33.3% of 45)                                      | 1 (1.8% of 56)                    | 85 (5.0% of 1,694)                      | 56 (9.6% of 583)                            | 61 (16.1% of 380)                     |
| Difficult to Treat resistance                               | 42 (1.1)                                               | 19 (23.5)                                             | 0                                 | 1 (0.04%)                               | 8 (1.0%)                                    | 14 (3.5)                              |
|                                                             | BSI Episodes with Gram-Positive Bacteria, No. (%)      |                                                       |                                   |                                         |                                             |                                       |
|                                                             | <i>Staphylococcus aureus</i> (N=2,936)                 | <i>Streptococcus</i> $\beta$ -hemolytic group (N=553) | <i>Streptococcus</i> spp. (N=223) | <i>Streptococcus pneumoniae</i> (N=375) | <i>Streptococcus viridans</i> group (N=568) | <i>Enterococcus</i> spp. (N=1,187)    |
| Methicillin resistance                                      | 1,057 (36.0)                                           | 0                                                     | 0                                 | 0                                       | 0                                           | 0                                     |
| Penicillin resistance                                       | 0                                                      | 2 (0.4)                                               | 55 (24.7)                         | 0                                       | 199 (35.0)                                  | 0                                     |
| Vancomycin resistance                                       | 4 (0.1% of 2,811) <sup>b</sup>                         | 0                                                     | 0                                 | 0                                       | 0                                           | 205 (17.3)                            |
| Daptomycin resistance                                       | 2 (0.5% of 401) <sup>b</sup>                           | 0                                                     | 0                                 | 0                                       | 0                                           | 0                                     |
| Extended-spectrum cephalosporin class resistance            | 0                                                      | 2 (0.7 % of 283) <sup>c</sup>                         | 6 (3.4% of 177) <sup>c</sup>      | 8 (2.1)                                 | 20 (5.7% of 348) <sup>c</sup>               | 0                                     |

<sup>a</sup> 949 Gram-negative isolates were not tested for piperacillin-tazobactam resistance. The proportion for each organism is calculated from the total tested.

<sup>b</sup> 125 *S. aureus* isolates were not tested for vancomycin resistance and 2,535 isolates were not tested for daptomycin resistance. The proportions are calculated from the total tested.

<sup>c</sup> 536 *Streptococcus* isolates were not tested for extended-spectrum cephalosporin class resistance. The proportions are calculated from the total tested.

**Supplemental Table 6.** Demographics and Comorbidities Among Patients Who Died Within One Year of Bloodstream Infection (BSI) Diagnosis, Stratified by BSI Organisms

| Characteristics                                          | Total Patients Who Died, No. (%) (N=2,977) | BSI Organism Group, No. (%)    |                                                  |                                      |                                    |                                  |
|----------------------------------------------------------|--------------------------------------------|--------------------------------|--------------------------------------------------|--------------------------------------|------------------------------------|----------------------------------|
|                                                          |                                            | Lactose-Fermenting GNB (N=922) | <i>Streptococcus / Enterococcus</i> spp. (N=933) | <i>Staphylococcus aureus</i> (N=707) | Non-Lactose-Fermenting GNB (N=180) | Multiple Organism Groups (N=235) |
| <i>Age Group, years</i>                                  |                                            |                                |                                                  |                                      |                                    |                                  |
| 18-25                                                    | 38 (1.3)                                   | 8 (0.9)                        | 15 (1.6)                                         | 6 (0.8)                              | 3 (1.7)                            | 6 (2.5)                          |
| 26-35                                                    | 52 (1.7)                                   | 18 (1.9)                       | 15 (1.6)                                         | 10 (1.4)                             | 4 (2.2)                            | 5 (2.1)                          |
| 36-45                                                    | 78 (2.6)                                   | 29 (3.1)                       | 18 (1.9)                                         | 18 (2.5)                             | 7 (3.9)                            | 6 (2.5)                          |
| 46-64                                                    | 607 (20.4)                                 | 190 (20.6)                     | 201 (21.5)                                       | 124 (17.5)                           | 37 (20.6)                          | 55 (23.4)                        |
| ≥65                                                      | 2,202 (74.0)                               | 677 (73.4)                     | 684 (73.3)                                       | 549 (77.6)                           | 129 (71.7)                         | 163 (69.4)                       |
| <i>Sex</i>                                               |                                            |                                |                                                  |                                      |                                    |                                  |
| Female                                                   | 1,112 (37.3)                               | 383 (41.5)                     | 344 (36.9)                                       | 241 (34.1)                           | 70 (38.9)                          | 74 (31.5)                        |
| Male                                                     | 1,865 (62.7)                               | 539 (58.5)                     | 589 (63.1)                                       | 466 (65.9)                           | 110 (61.1)                         | 161 (68.5)                       |
| <i>Race</i>                                              |                                            |                                |                                                  |                                      |                                    |                                  |
| African American                                         | 499 (16.8)                                 | 162 (17.6)                     | 155 (16.6)                                       | 100 (14.1)                           | 37 (20.6)                          | 45 (19.1)                        |
| Asian or Pacific Islander                                | 213 (7.1)                                  | 73 (7.9)                       | 61 (6.5)                                         | 39 (5.5)                             | 21 (11.7)                          | 19 (8.1)                         |
| Caucasian                                                | 1,869 (62.6)                               | 554 (60.1)                     | 594 (63.7)                                       | 472 (66.8)                           | 106 (58.9)                         | 143 (60.9)                       |
| Other                                                    | 396 (13.3)                                 | 133 (14.4)                     | 123 (13.2)                                       | 96 (13.6)                            | 16 (8.9)                           | 28 (11.9)                        |
| Had ≥1 comorbidity preceding BSI                         | 2,889 (97.0)                               | 898 (97.4)                     | 900 (96.5)                                       | 691 (97.7)                           | 175 (97.2)                         | 225 (95.7)                       |
| <i>Comorbidities preceding BSI<sup>a</sup></i>           |                                            |                                |                                                  |                                      |                                    |                                  |
| Chronic pulmonary disease                                | 1,801 (60.5)                               | 506 (54.9)                     | 590 (63.2)                                       | 460 (65.1)                           | 103 (57.2)                         | 142 (60.4)                       |
| Malignancy, including lymphoma and leukemia <sup>b</sup> | 1,659 (55.7)                               | 554 (60.1)                     | 503 (53.9)                                       | 337 (47.7)                           | 124 (68.9)                         | 141 (60.0)                       |
| Diabetes without chronic complication                    | 1,597 (53.6)                               | 480 (52.1)                     | 486 (52.1)                                       | 426 (60.3)                           | 90 (50.0)                          | 115 (48.9)                       |

|                             |              |            |            |            |           |            |
|-----------------------------|--------------|------------|------------|------------|-----------|------------|
| Renal disease               | 1,505 (50.6) | 429 (46.5) | 489 (52.4) | 397 (56.2) | 82 (45.6) | 108 (46.0) |
| Peripheral vascular disease | 1,499 (50.4) | 423 (45.9) | 479 (51.3) | 406 (57.4) | 87 (48.3) | 104 (44.3) |
| Congestive heart failure    | 1,484 (49.8) | 413 (44.8) | 470 (50.4) | 401 (56.7) | 88 (48.9) | 112 (47.7) |

---

GNB – Gram-negative bacilli

<sup>a</sup> Most frequent comorbidities are listed. Categories are not mutually exclusive. These comorbidities are an amalgamation of the Clinical Classification Software diagnosis mapping categories.

<sup>b</sup> Excludes malignant neoplasms of the skin
